# Supplementary material for: Validation of the Delirium Diagnostic Tool-Provisional (DDT-Pro) With Medical Inpatients and Comparison With the Confusion Assessment Method Algorithm
Source: Atypon-hosted journal article supplement (doi:10.1176/appi.neuropsych.18110255), 2019-10-30
Supplement: appi.neuropsych.18110255.ds001.pdf [file appi.neuropsych.18110255.ds001.pdf]

**Supplemental Table S1.** Median and interquartile range of the Delirium Diagnostic Tool-Provisional (DDT-Pro) item and total scores as measured in internal medicine inpatients. Comparisons are for no delirium and delirium using DSM-5 within each group and all are significant at  $p < 0.001$  for Mann-Whitney U test.

| DDT-Pro Item   | Whole sample (n =200) |                  |                 |                      |     |     | IQCODE <sup>a</sup> dementia subgroup (n =74) <sup>b</sup> |     |     |                     |     |     |
|----------------|-----------------------|------------------|-----------------|----------------------|-----|-----|------------------------------------------------------------|-----|-----|---------------------|-----|-----|
|                | Delirium (n =50)      |                  |                 | No delirium (n =150) |     |     | Delirium (n =34)                                           |     |     | No delirium (n =40) |     |     |
| By a physician | Median                | IQR <sup>a</sup> |                 | Median               | IQR |     | Median                                                     | IQR |     | Median              | IQR |     |
|                |                       | LB <sup>a</sup>  | UB <sup>a</sup> |                      | LB  | UB  |                                                            | LB  | UB  |                     | LB  | UB  |
| Comprehension  | 2.0                   | 1.0              | 2.0             | 3.0                  | 2.0 | 3.0 | 1.0                                                        | 0.0 | 2.0 | 3.0                 | 2.0 | 3.0 |
| Vigilance      | 1.0                   | 0.0              | 2.0             | 3.0                  | 3.0 | 3.0 | 0.5                                                        | 0.0 | 1.2 | 3.0                 | 3.0 | 3.0 |
| Sleep/wake     | 1.0                   | 1.0              | 2.0             | 2.0                  | 2.0 | 3.0 | 1.0                                                        | 1.0 | 2.0 | 2.0                 | 2.0 | 2.7 |
| Total scale    | 4.0                   | 2.0              | 5.2             | 8.0                  | 7.0 | 8.0 | 3.5                                                        | 2.0 | 5.0 | 7.5                 | 6.2 | 8.0 |
| By a nurse     | Median                | IQR              |                 | Median               | IQR |     | Median                                                     | IQR |     | Median              | IQR |     |
|                |                       | LB               | UB              |                      | LB  | UB  |                                                            | LB  | UB  |                     | LB  | UB  |
| Comprehension  | 1.0                   | 0.0              | 2.2             | 3.0                  | 3.0 | 3.0 | 1.0                                                        | 0.0 | 2.2 | 3.0                 | 3.0 | 3.0 |
| Vigilance      | 0.0                   | 0.0              | 2.0             | 3.0                  | 3.0 | 3.0 | 0.0                                                        | 0.0 | 1.2 | 3.0                 | 3.0 | 3.0 |
| Sleep/wake     | 1.0                   | 0.0              | 1.0             | 2.0                  | 2.0 | 3.0 | 1.0                                                        | 0.0 | 1.0 | 2.0                 | 1.0 | 2.0 |
| Total scale    | 3.0                   | 1.0              | 5.0             | 8.0                  | 7.0 | 8.0 | 2.5                                                        | 0.0 | 4.5 | 8.0                 | 7.0 | 8.0 |

<sup>a</sup> IQCODE: Informant Questionnaire on Cognitive Decline in the Elderly; IQR: interquartile range; LB: Lower bound of the interquartile range; UB: Upper bound of the interquartile range.

<sup>b</sup> Most dementia cases are according to IQCODE score  $>85$ , except 2 (1.0%) that are diagnosed by psychiatrist clinical impression using all available sources, due to absence of any familiar or home caregiver for IQCODE assessment.

**Supplemental Table S2.** Frequency (percentage) of the Delirium Diagnostic Tool-Provisional (DDT-Pro) scores 0, 1, 2, and 3, as measured in internal medicine inpatients. Delirium diagnosis status used DSM-5 criteria. Comparisons between physician and nurse within the delirium or the no delirium group are with Cochran Q test<sup>a</sup>.

| DDT-Pro Score      | Whole sample (n =200) |                   |                      |                   | IQCODE <sup>b</sup> dementia (n =74) <sup>c</sup> |                   |                     |                   |
|--------------------|-----------------------|-------------------|----------------------|-------------------|---------------------------------------------------|-------------------|---------------------|-------------------|
|                    | Delirium (n =50)      |                   | No delirium (n =150) |                   | Delirium (n =34)                                  |                   | No delirium (n =40) |                   |
| Comprehension item | Physician             | Nurse             | Physician            | Nurse             | Physician                                         | Nurse             | Physician           | Nurse             |
| 0                  | 22.0                  | 32.0              | 0.0                  | 0.7               | 26.5                                              | 41.2              | 0.0                 | 2.5               |
| 1                  | 22.0                  | 20.0              | 2.7                  | 2.0               | 26.5                                              | 17.6              | 2.5                 | 2.5               |
| 2                  | 48.0 <sup>a</sup>     | 24.0 <sup>a</sup> | 32.7 <sup>a</sup>    | 15.3 <sup>a</sup> | 41.2 <sup>a</sup>                                 | 17.6 <sup>a</sup> | 50.0 <sup>a</sup>   | 15.0 <sup>a</sup> |

|                        |                   |                   |                   |                   |                   |                   |                   |                   |
|------------------------|-------------------|-------------------|-------------------|-------------------|-------------------|-------------------|-------------------|-------------------|
| 3                      | 8.0 <sup>a</sup>  | 24.0 <sup>a</sup> | 64.7 <sup>a</sup> | 82.0 <sup>a</sup> | 5.9               | 23.5              | 47.5 <sup>a</sup> | 80.0 <sup>a</sup> |
| <b>Vigilance item</b>  | Physician         | Nurse             | Physician         | Nurse             | Physician         | Nurse             | Physician         | Nurse             |
| 0                      | 46.0              | 56.0              | 0.7 <sup>a</sup>  | 4.7 <sup>a</sup>  | 50.0              | 67.6              | 0.0               | 7.5               |
| 1                      | 24.0              | 12.0              | 4.7               | 2.0               | 26.5              | 8.8               | 7.5               | 5.0               |
| 2                      | 16.0              | 14.0              | 6.7               | 4.0               | 17.6              | 11.8              | 10.0 <sup>a</sup> | 0.0 <sup>a</sup>  |
| 3                      | 14.0              | 18.0              | 88.0              | 89.3              | 5.9               | 11.8              | 82.5              | 87.5              |
| <b>Sleep/wake item</b> | Physician         | Nurse             | Physician         | Nurse             | Physician         | Nurse             | Physician         | Nurse             |
| 0                      | 6.0 <sup>a</sup>  | 30.0 <sup>a</sup> | 0.0               | 1.3               | 5.9 <sup>a</sup>  | 32.4 <sup>a</sup> | 0.0               | 2.5               |
| 1                      | 52.0              | 54.0              | 8.0 <sup>a</sup>  | 15.3 <sup>a</sup> | 50.0              | 50.0              | 12.5              | 25.0              |
| 2                      | 38.0 <sup>a</sup> | 16.0 <sup>a</sup> | 64.7              | 58.0              | 38.2 <sup>a</sup> | 17.6 <sup>a</sup> | 62.5              | 52.5              |
| 3                      | 4.0               | 0.0               | 27.3              | 25.3              | 5.9               | 0.0               | 25.0              | 20.0              |

<sup>a</sup> Significant differences at  $p < 0.05$  are denoted by a super index a (<sup>a</sup>) in the corresponding cells.

<sup>b</sup> IQCODE: Informant Questionnaire on Cognitive Decline in the Elderly.

<sup>c</sup> Most dementia cases are according to IQCODE score  $>85$ , except 2 (1.0%) that are diagnosed by psychiatrist clinical impression using all available sources, due to absence of any familiar or home caregiver for IQCODE assessment.
